# Supplementary material
Source: publisher figshare collection journal article supplement (https://asha.figshare.com/ndownloader/files/15738890)
Supplement: Supplementary file 1 [file 15738890]

## Sheet: Blad1
Supplemental material, Witte & Köbler, “Linguistic Materials and Metrics for the Creation of Well-Controlled Swedish Speech Perception Tests,” JSLHR, https://doi.org/10.1044/2019_JSLHR-S-18-0454
	Supplemental Material S2. Swedish positional segment probabilities (PSP) and standardized positional segment probability (S-PSP).
	Position	Phone	Positional segment probability (PSP)	Standardized positional segment probability (S-PSP)
	0	a	0.037169	0.677381
	0	ɑ	0.000135603	-0.751097
	0	ɑː	0.0129155	-0.258141
	0	a͡u	0.000968558	-0.718968
	0	a͡uː	0.000207352	-0.74833
	0	b	0.0727399	2.04945
	0	ɔ	0.0106778	-0.344458
	0	ɕ	0.0132753	-0.244262
	0	d	0.0338499	0.549354
	0	e	0.000181347	-0.749333
	0	e̞	0.0107642	-0.341124
	0	eː	0.00633448	-0.51199
	0	e͡ʉ	0.000420312	-0.740115
	0	e͡ʉː	1.81958e-05	-0.755626
	0	ɛ	8.74327e-05	-0.752955
	0	ɛ̝	0.00989928	-0.374486
	0	ɛː	0.00143829	-0.700849
	0	f	0.0771423	2.21926
	0	ɡ	0.0306054	0.424206
	0	h	0.0453329	0.992285
	0	ɧ	0.0191371	-0.0181577
	0	i	0.000161821	-0.750086
	0	ɪ	0.025159	0.214122
	0	iː	0.00316668	-0.634181
	0	ʝ	0.0273768	0.299668
	0	k	0.0679608	1.86511
	0	l	0.0404106	0.80242
	0	m	0.0492497	1.14337
	0	n	0.0247361	0.197809
	0	o	0.000220082	-0.747839
	0	ɵ	0.0146953	-0.189489
	0	oː	0.00619061	-0.517539
	0	p	0.0482055	1.10309
	0	r	0.0420072	0.864005
	0	s	0.125572	4.08733
	0	ʂ	0.000804288	-0.725304
	0	t	0.0539364	1.32414
	0	ʈ	9.24183e-06	-0.755971
	0	u	9.70437e-05	-0.752585
	0	ʉ	0.000618466	-0.732472
	0	ʉ̞	0.000147617	-0.750634
	0	ʊ	0.00265244	-0.654016
	0	uː	0.0132165	-0.246532
	0	ʉː	0.0137865	-0.224544
	0	v	0.043482	0.920891
	0	y	1.06596e-06	-0.756287
	0	ʏ	0.0018677	-0.684286
	0	yː	0.000451795	-0.738901
	0	ø	0.000264519	-0.746125
	0	ø̞	0.00180686	-0.686632
	0	øː	0.00844504	-0.430579
	1	a	0.0975593	4.29483
	1	ɑ	0.00106877	-0.625392
	1	ɑː	0.033254	1.01579
	1	a͡u	0.000220281	-0.668658
	1	a͡uː	0.000758978	-0.641188
	1	b	0.00267286	-0.543596
	1	bː	0.000213825	-0.668987
	1	ɔ	0.0524923	1.99679
	1	ɕ	0.000206122	-0.66938
	1	d	0.00542972	-0.403019
	1	dː	0.00037003	-0.661022
	1	ɖ	0.00126668	-0.6153
	1	e	0.00164739	-0.595887
	1	e̞	0.0472339	1.72865
	1	eː	0.0291254	0.805264
	1	e͡ʉ	6.29524e-05	-0.67668
	1	e͡ʉː	1.52816e-05	-0.679111
	1	ɛ	0.000450963	-0.656895
	1	ɛ̝	0.0555171	2.15103
	1	ɛː	0.0229499	0.490365
	1	f	0.00313302	-0.520132
	1	fː	0.0025603	-0.549336
	1	ɡ	0.00306155	-0.523776
	1	ɡː	0.000553464	-0.651668
	1	h	0.0006395	-0.647281
	1	ɧ	0.000340448	-0.66253
	1	ɧː	7.96912e-05	-0.675826
	1	i	0.00161464	-0.597557
	1	ɪ	0.057581	2.25627
	1	iː	0.0233678	0.511673
	1	ʝ	0.00544247	-0.402369
	1	ʝː	0.000473012	-0.65577
	1	k	0.0231954	0.502886
	1	kː	0.00266335	-0.544081
	1	l	0.0456682	1.64881
	1	ɭ	0.000474865	-0.655676
	1	lː	0.00688956	-0.328579
	1	m	0.0110759	-0.11511
	1	ɱ	0.00224033	-0.565652
	1	mː	0.00631267	-0.357996
	1	ɱː	0.0024432	-0.555307
	1	n	0.0220104	0.442457
	1	ɳ	0.000486866	-0.655064
	1	nː	0.0178868	0.232189
	1	ŋ	0.00138521	-0.609256
	1	ŋː	0.00549115	-0.399887
	1	o	0.000405666	-0.659204
	1	ɵ	0.0313013	0.916217
	1	oː	0.0199303	0.336392
	1	p	0.0155239	0.111698
	1	pː	0.00864888	-0.238868
	1	r	0.0826581	3.53499
	1	rː	0.00537552	-0.405783
	1	s	0.00747101	-0.29893
	1	ʂ	0.00152998	-0.601874
	1	sː	0.00261117	-0.546742
	1	ʂː	0.000142069	-0.672646
	1	t	0.0434759	1.53702
	1	ʈ	0.00117754	-0.619845
	1	tː	0.00141918	-0.607524
	1	ʈː	0.00040795	-0.659088
	1	u	0.000696302	-0.644384
	1	ʉ	0.00568783	-0.389858
	1	ʉ̞	0.00141883	-0.607542
	1	ʊ	0.0200916	0.344615
	1	uː	0.021905	0.437083
	1	ʉː	0.0187517	0.27629
	1	v	0.032132	0.958578
	1	vː	5.73773e-05	-0.676964
	1	y	0.000466034	-0.656126
	1	ʏ	0.0167986	0.1767
	1	yː	0.00997928	-0.171029
	1	ø	0.000487625	-0.655025
	1	ø̞	0.0278707	0.741284
	1	øː	0.0219922	0.44153
	2	a	0.0427746	2.06903
	2	ɑ	0.000517434	-0.866129
	2	ɑː	0.0153535	0.164375
	2	a͡u	9.24268e-05	-0.89565
	2	a͡uː	0.000301191	-0.881149
	2	b	0.0180007	0.348245
	2	bː	0.00295026	-0.697146
	2	ɔ	0.0163224	0.231674
	2	ɕ	0.00167281	-0.785877
	2	d	0.0417839	2.00021
	2	dː	0.00373239	-0.64282
	2	ɖ	0.0108622	-0.147587
	2	e	0.000823297	-0.844884
	2	e̞	0.0287187	1.09271
	2	eː	0.0105061	-0.172324
	2	e͡ʉ	6.49759e-06	-0.901618
	2	e͡ʉː	5.12941e-06	-0.901713
	2	ɛ	0.000208202	-0.887608
	2	ɛ̝	0.0201889	0.500237
	2	ɛː	0.00909624	-0.270251
	2	f	0.0112875	-0.118044
	2	fː	0.00722675	-0.400104
	2	ɡ	0.0225713	0.66572
	2	ɡː	0.0052264	-0.539047
	2	h	0.00544549	-0.523829
	2	ɧ	0.00361072	-0.651272
	2	ɧː	0.000253586	-0.884456
	2	i	0.000437433	-0.871686
	2	ɪ	0.0253378	0.857879
	2	iː	0.0106177	-0.164573
	2	ʝ	0.00663157	-0.441445
	2	ʝː	0.00674198	-0.433776
	2	k	0.0325469	1.35862
	2	kː	0.0230611	0.699739
	2	l	0.0482296	2.44793
	2	ɭ	0.00426693	-0.605691
	2	lː	0.0405637	1.91546
	2	ɭː	7.15224e-06	-0.901573
	2	m	0.0205558	0.525723
	2	ɱ	0.00229427	-0.742711
	2	mː	0.0238732	0.756149
	2	ɱː	0.000262279	-0.883852
	2	n	0.0354966	1.5635
	2	ɳ	0.00869496	-0.298123
	2	nː	0.0336216	1.43327
	2	ɳː	0.000444163	-0.871218
	2	ŋ	0.00398537	-0.625249
	2	ŋː	0.015409	0.168227
	2	o	0.000543672	-0.864307
	2	ɵ	0.0103825	-0.18091
	2	oː	0.0118979	-0.0756517
	2	p	0.0148299	0.128003
	2	pː	0.00694034	-0.419998
	2	r	0.0637991	3.52937
	2	rː	0.0206006	0.528835
	2	s	0.0535702	2.81888
	2	ʂ	0.0097528	-0.224646
	2	sː	0.0240445	0.768044
	2	ʂː	0.00504724	-0.551491
	2	t	0.0455734	2.26343
	2	ʈ	0.0057613	-0.501893
	2	tː	0.0172285	0.294614
	2	ʈː	0.00517892	-0.542345
	2	u	0.000411465	-0.87349
	2	ʉ	0.00203226	-0.76091
	2	ʉ̞	0.000470217	-0.869409
	2	ʊ	0.0129053	-0.0056727
	2	uː	0.0117874	-0.0833259
	2	ʉː	0.00710701	-0.408421
	2	v	0.0238387	0.753752
	2	vː	0.000579299	-0.861832
	2	y	0.000146874	-0.891868
	2	ʏ	0.00567617	-0.507806
	2	yː	0.00525474	-0.537079
	2	ø	0.000348192	-0.877884
	2	ø̞	0.00497735	-0.556346
	2	øː	0.00669653	-0.436933
	3	a	0.0773519	3.41295
	3	ɑ	0.00290999	-0.555688
	3	ɑː	0.0126574	-0.0360362
	3	a͡u	7.79048e-05	-0.706671
	3	a͡uː	0.000137366	-0.703501
	3	b	0.0223669	0.481597
	3	bː	0.00187351	-0.610944
	3	ɔ	0.016064	0.145577
	3	ɕ	0.00276711	-0.563305
	3	d	0.0406242	1.45492
	3	dː	0.00225171	-0.590781
	3	ɖ	0.00185054	-0.612169
	3	e	0.00553469	-0.41576
	3	e̞	0.0807684	3.59509
	3	eː	0.0112923	-0.108813
	3	e͡ʉ	7.51957e-05	-0.706815
	3	ɛ	0.000521612	-0.683016
	3	ɛ̝	0.0200819	0.359779
	3	ɛː	0.00482425	-0.453635
	3	f	0.0186423	0.283029
	3	fː	0.00270935	-0.566384
	3	ɡ	0.0179027	0.243603
	3	ɡː	0.00253082	-0.575902
	3	h	0.0112374	-0.111738
	3	ɧ	0.00614998	-0.382957
	3	ɧː	1.12094e-05	-0.710227
	3	i	0.00151176	-0.63023
	3	ɪ	0.0505211	1.98255
	3	iː	0.013602	0.0143251
	3	ʝ	0.0151451	0.0965902
	3	ʝː	0.00192951	-0.607959
	3	k	0.0474097	1.81667
	3	kː	0.011809	-0.0812656
	3	l	0.0386965	1.35216
	3	ɭ	0.00271053	-0.566321
	3	lː	0.00782651	-0.293579
	3	m	0.0249703	0.620386
	3	ɱ	0.00101153	-0.656898
	3	mː	0.00919438	-0.220655
	3	ɱː	0.000221628	-0.699009
	3	n	0.032568	1.02543
	3	ɳ	0.00198056	-0.605237
	3	nː	0.0121512	-0.0630198
	3	ɳː	0.000246695	-0.697672
	3	ŋ	0.00160421	-0.625301
	3	ŋː	0.00512573	-0.437562
	3	o	0.00130082	-0.641475
	3	ɵ	0.00978116	-0.189373
	3	oː	0.00667829	-0.354792
	3	p	0.0214085	0.4305
	3	pː	0.00427852	-0.482728
	3	r	0.0438051	1.6245
	3	rː	0.00478596	-0.455676
	3	s	0.0720725	3.13149
	3	ʂ	0.00948721	-0.205044
	3	sː	0.00892213	-0.235169
	3	ʂː	0.000502156	-0.684053
	3	t	0.0684152	2.93652
	3	ʈ	0.00513367	-0.437139
	3	tː	0.010511	-0.150461
	3	ʈː	0.00250321	-0.577374
	3	u	0.000868675	-0.664514
	3	ʉ	0.00665688	-0.355934
	3	ʉ̞	0.000705857	-0.673194
	3	ʊ	0.0201167	0.361635
	3	uː	0.00512196	-0.437763
	3	ʉː	0.00476053	-0.457032
	3	v	0.0316132	0.974532
	3	vː	0.00021405	-0.699413
	3	y	0.000469069	-0.685817
	3	ʏ	0.00478133	-0.455923
	3	yː	0.00269559	-0.567117
	3	ø	0.00103495	-0.655649
	3	ø̞	0.00325409	-0.537343
	3	øː	0.00467105	-0.461802
	4	a	0.0825404	3.64045
	4	ɑ	0.00479236	-0.438934
	4	ɑː	0.0194115	0.328122
	4	a͡u	0.000175656	-0.68117
	4	a͡uː	9.55224e-05	-0.685374
	4	b	0.0186533	0.288338
	4	bː	0.000228679	-0.678387
	4	ɔ	0.0181377	0.261286
	4	ɕ	0.00247241	-0.56066
	4	d	0.0283934	0.7994
	4	dː	0.000948595	-0.640614
	4	ɖ	0.00333896	-0.515193
	4	ɖː	4.52468e-06	-0.690149
	4	e	0.00191895	-0.5897
	4	e̞	0.0587192	2.39057
	4	eː	0.0142245	0.0559621
	4	e͡ʉ	4.94343e-05	-0.687792
	4	ɛ	0.0016544	-0.603581
	4	ɛ̝	0.0260108	0.674385
	4	ɛː	0.00684319	-0.331328
	4	f	0.015271	0.110874
	4	fː	0.00156857	-0.608084
	4	ɡ	0.0194648	0.330919
	4	ɡː	0.00133209	-0.620492
	4	h	0.0088527	-0.225891
	4	ɧ	0.00721223	-0.311965
	4	ɧː	1.30494e-05	-0.689701
	4	i	0.00192092	-0.589597
	4	ɪ	0.0533033	2.1064
	4	iː	0.0128998	-0.0135436
	4	ʝ	0.00676954	-0.335193
	4	ʝː	0.00152506	-0.610367
	4	k	0.0380859	1.30796
	4	kː	0.00567177	-0.392792
	4	l	0.0512471	1.99852
	4	ɭ	0.00281888	-0.542482
	4	lː	0.00926131	-0.204451
	4	m	0.0223612	0.482889
	4	ɱ	0.00167212	-0.602651
	4	mː	0.00461329	-0.44833
	4	ɱː	6.88922e-06	-0.690025
	4	n	0.0532704	2.10468
	4	ɳ	0.00738806	-0.30274
	4	nː	0.00962454	-0.185393
	4	ɳː	6.48539e-05	-0.686983
	4	ŋ	0.00752598	-0.295503
	4	ŋː	0.0050357	-0.426166
	4	o	0.0021878	-0.575594
	4	ɵ	0.0111221	-0.106816
	4	oː	0.00822798	-0.25867
	4	p	0.0158122	0.139268
	4	pː	0.0015894	-0.606991
	4	r	0.0781678	3.41103
	4	rː	0.0034109	-0.511418
	4	s	0.0655718	2.75012
	4	ʂ	0.0103722	-0.146162
	4	sː	0.00631854	-0.358856
	4	ʂː	0.000727816	-0.652198
	4	t	0.0634945	2.64113
	4	ʈ	0.00526831	-0.413961
	4	tː	0.00569952	-0.391336
	4	ʈː	0.000760039	-0.650507
	4	u	0.00125288	-0.624648
	4	ʉ	0.00590156	-0.380735
	4	ʉ̞	0.000730253	-0.65207
	4	ʊ	0.0188512	0.298723
	4	uː	0.00810333	-0.26521
	4	ʉː	0.00664788	-0.341576
	4	v	0.0177798	0.242509
	4	vː	7.30002e-05	-0.686556
	4	y	0.000672106	-0.655121
	4	ʏ	0.00579714	-0.386214
	4	yː	0.00295657	-0.535257
	4	ø	0.00167694	-0.602398
	4	ø̞	0.00513489	-0.420962
	4	øː	0.00829713	-0.255041
	5	a	0.081427	3.59313
	5	ɑ	0.00401428	-0.513774
	5	ɑː	0.01995	0.331645
	5	a͡u	6.0962e-05	-0.723506
	5	a͡uː	0.000127217	-0.719991
	5	b	0.0146091	0.0483046
	5	bː	0.000635346	-0.693033
	5	ɔ	0.0174535	0.199205
	5	ɕ	0.00188588	-0.62669
	5	d	0.0384805	1.31473
	5	dː	0.00118108	-0.664081
	5	ɖ	0.00548029	-0.435999
	5	e	0.00245099	-0.59671
	5	e̞	0.0530616	2.08828
	5	eː	0.0184643	0.252829
	5	e͡ʉ	6.30844e-06	-0.726405
	5	ɛ	0.00108771	-0.669034
	5	ɛ̝	0.023193	0.503696
	5	ɛː	0.00877409	-0.261257
	5	f	0.0124628	-0.065561
	5	fː	0.00165752	-0.638805
	5	ɡ	0.0256049	0.631651
	5	ɡː	0.00172451	-0.635251
	5	h	0.00808924	-0.297589
	5	ɧ	0.00601033	-0.40788
	5	i	0.0020704	-0.616901
	5	ɪ	0.0527442	2.07144
	5	iː	0.0154601	0.0934479
	5	ʝ	0.00737642	-0.335406
	5	ʝː	0.00136058	-0.654558
	5	k	0.0332503	1.03725
	5	kː	0.00865772	-0.26743
	5	l	0.0437802	1.59589
	5	ɭ	0.0019624	-0.622631
	5	lː	0.010545	-0.167307
	5	m	0.0190675	0.284831
	5	ɱ	0.000791546	-0.684747
	5	mː	0.00535195	-0.442808
	5	n	0.0575929	2.32868
	5	ɳ	0.0094967	-0.222921
	5	nː	0.0138668	0.00892038
	5	ɳː	1.28728e-05	-0.726057
	5	ŋ	0.0123581	-0.0711185
	5	ŋː	0.00545273	-0.437461
	5	o	0.00134265	-0.65551
	5	ɵ	0.00956911	-0.219079
	5	oː	0.00937664	-0.22929
	5	p	0.0154928	0.0951825
	5	pː	0.00236777	-0.601125
	5	r	0.0734994	3.17255
	5	rː	0.00653012	-0.380304
	5	s	0.0704201	3.00919
	5	ʂ	0.00983233	-0.205115
	5	sː	0.00747375	-0.330242
	5	ʂː	0.00100527	-0.673408
	5	t	0.0608916	2.50368
	5	ʈ	0.00444364	-0.490996
	5	tː	0.00709252	-0.350467
	5	ʈː	0.00139891	-0.652525
	5	u	0.00170272	-0.636407
	5	ʉ	0.00448785	-0.48865
	5	ʉ̞	0.000333204	-0.709063
	5	ʊ	0.0117367	-0.104083
	5	uː	0.00841158	-0.280489
	5	ʉː	0.00563696	-0.427688
	5	v	0.015987	0.121402
	5	vː	0.000101149	-0.721374
	5	y	0.000604527	-0.694668
	5	ʏ	0.00467266	-0.478846
	5	yː	0.00270706	-0.583125
	5	ø	0.0014579	-0.649395
	5	ø̞	0.00551096	-0.434372
	5	øː	0.00682236	-0.3648
	6	a	0.0937942	3.91569
	6	ɑ	0.00236226	-0.554209
	6	ɑː	0.017634	0.192392
	6	a͡u	6.69376e-05	-0.666422
	6	a͡uː	6.02261e-05	-0.66675
	6	b	0.0103593	-0.163252
	6	bː	0.000684264	-0.636243
	6	ɔ	0.0145296	0.0406265
	6	ɕ	0.00113384	-0.614264
	6	d	0.0417282	1.3703
	6	dː	0.00131472	-0.605421
	6	ɖ	0.00416774	-0.465944
	6	e	0.00268206	-0.538575
	6	e̞	0.075366	3.01477
	6	eː	0.0196056	0.288777
	6	ɛ	0.000740133	-0.633511
	6	ɛ̝	0.0188178	0.250263
	6	ɛː	0.00677355	-0.338551
	6	f	0.00964983	-0.197937
	6	fː	0.00175992	-0.583656
	6	ɡ	0.0216515	0.388799
	6	ɡː	0.00196545	-0.573608
	6	h	0.00720778	-0.317323
	6	ɧ	0.00655059	-0.349452
	6	ɧː	1.05906e-05	-0.669177
	6	i	0.00123832	-0.609156
	6	ɪ	0.0515782	1.85185
	6	iː	0.0139001	0.00985093
	6	ʝ	0.00792465	-0.282277
	6	ʝː	0.00108444	-0.616679
	6	k	0.0339526	0.990171
	6	kː	0.00930107	-0.214986
	6	l	0.0385901	1.21689
	6	ɭ	0.00145251	-0.598685
	6	lː	0.0112431	-0.120043
	6	m	0.0152295	0.0748429
	6	ɱ	0.000613164	-0.639719
	6	mː	0.00797861	-0.279639
	6	n	0.0601777	2.27226
	6	ɳ	0.00922502	-0.218704
	6	nː	0.013772	0.00358491
	6	ɳː	0.000112179	-0.664211
	6	ŋ	0.0150221	0.0647008
	6	ŋː	0.00550302	-0.400665
	6	o	0.00100474	-0.620575
	6	ɵ	0.00735842	-0.309958
	6	oː	0.00777016	-0.289829
	6	p	0.0128734	-0.0403427
	6	pː	0.00309027	-0.518618
	6	r	0.064711	2.49388
	6	rː	0.00636134	-0.358703
	6	s	0.0799843	3.24055
	6	ʂ	0.00814914	-0.271302
	6	sː	0.00975925	-0.192587
	6	ʂː	0.000872946	-0.627018
	6	t	0.0631307	2.41662
	6	ʈ	0.00344534	-0.50126
	6	tː	0.00768111	-0.294183
	6	ʈː	0.00145734	-0.598449
	6	u	0.000923222	-0.624561
	6	ʉ	0.00346572	-0.500264
	6	ʉ̞	0.000337357	-0.653202
	6	ʊ	0.0117709	-0.0942418
	6	uː	0.00819044	-0.269283
	6	ʉː	0.00464234	-0.442741
	6	v	0.0148291	0.0552673
	6	vː	0.000161092	-0.661819
	6	y	0.000279406	-0.656035
	6	ʏ	0.0043568	-0.456701
	6	yː	0.0024694	-0.548971
	6	ø	0.00105364	-0.618185
	6	ø̞	0.00551838	-0.399914
	6	øː	0.00583818	-0.38428
	7	a	0.100887	3.9139
	7	ɑ	0.00184957	-0.513356
	7	ɑː	0.0127797	-0.0247511
	7	a͡u	4.00068e-05	-0.594249
	7	a͡uː	5.66431e-05	-0.593505
	7	b	0.00924335	-0.182834
	7	bː	0.000624137	-0.568137
	7	ɔ	0.00950529	-0.171124
	7	ɕ	0.00105957	-0.548672
	7	d	0.04066	1.22158
	7	dː	0.00121511	-0.541718
	7	ɖ	0.00345799	-0.441456
	7	e	0.00207425	-0.503312
	7	e̞	0.0920779	3.5201
	7	eː	0.0196404	0.281942
	7	e͡ʉ	2.18466e-05	-0.595061
	7	ɛ	0.000360698	-0.579913
	7	ɛ̝	0.0145124	0.0527059
	7	ɛː	0.00554675	-0.348082
	7	f	0.00951634	-0.17063
	7	fː	0.00178678	-0.516163
	7	ɡ	0.0220299	0.38876
	7	ɡː	0.00170243	-0.519934
	7	h	0.00661434	-0.300358
	7	ɧ	0.00653913	-0.30372
	7	ɧː	5.90003e-06	-0.595773
	7	i	0.00106884	-0.548257
	7	ɪ	0.0514327	1.70315
	7	iː	0.0118396	-0.0667754
	7	ʝ	0.00612032	-0.322442
	7	ʝː	0.00102786	-0.550089
	7	k	0.0302884	0.75794
	7	kː	0.00715129	-0.276354
	7	l	0.0321572	0.84148
	7	ɭ	0.00131761	-0.537136
	7	lː	0.00969716	-0.162547
	7	m	0.0129038	-0.0192004
	7	ɱ	0.000389263	-0.578636
	7	mː	0.00583836	-0.335046
	7	ɱː	6.86519e-06	-0.59573
	7	n	0.0703089	2.54697
	7	ɳ	0.01486	0.0682441
	7	nː	0.0125473	-0.0351384
	7	ɳː	0.000132317	-0.590122
	7	ŋ	0.019584	0.27942
	7	ŋː	0.00454835	-0.392713
	7	o	0.000545627	-0.571646
	7	ɵ	0.00596015	-0.329602
	7	oː	0.00570528	-0.340995
	7	p	0.0108657	-0.11031
	7	pː	0.00257584	-0.48089
	7	r	0.0685939	2.4703
	7	rː	0.0054921	-0.350525
	7	s	0.0878507	3.33114
	7	ʂ	0.00917538	-0.185872
	7	sː	0.0077642	-0.248956
	7	ʂː	0.000803992	-0.560097
	7	t	0.0685252	2.46723
	7	ʈ	0.00296081	-0.463681
	7	tː	0.00617574	-0.319964
	7	ʈː	0.00179864	-0.515633
	7	u	0.000658262	-0.566611
	7	ʉ	0.00329625	-0.448686
	7	ʉ̞	0.000268881	-0.584017
	7	ʊ	0.0132664	-0.00298999
	7	uː	0.00852267	-0.21505
	7	ʉː	0.00394579	-0.419649
	7	v	0.0135833	0.0111729
	7	vː	0.000138909	-0.589828
	7	y	0.000103482	-0.591411
	7	ʏ	0.00308104	-0.458306
	7	yː	0.00201932	-0.505768
	7	ø	0.000859006	-0.557637
	7	ø̞	0.00428076	-0.404675
	7	øː	0.00415511	-0.410292
	8	a	0.104266	3.7173
	8	ɑ	0.00127195	-0.501426
	8	ɑː	0.0120871	-0.0584274
	8	a͡u	3.87909e-05	-0.551937
	8	a͡uː	4.00217e-05	-0.551887
	8	b	0.00728687	-0.255049
	8	bː	0.000627464	-0.527825
	8	ɔ	0.00837331	-0.210548
	8	ɕ	0.000816615	-0.520077
	8	d	0.0376687	0.989417
	8	dː	0.000915021	-0.516046
	8	ɖ	0.0024691	-0.452389
	8	e	0.00180558	-0.479568
	8	e̞	0.108134	3.87576
	8	eː	0.0174412	0.16088
	8	e͡ʉ	8.21265e-06	-0.55319
	8	ɛ	0.000250358	-0.543271
	8	ɛ̝	0.0134292	-0.00345242
	8	ɛː	0.00543039	-0.331092
	8	f	0.00829405	-0.213794
	8	fː	0.00154402	-0.490282
	8	ɡ	0.0200722	0.268649
	8	ɡː	0.00104635	-0.510667
	8	h	0.00568831	-0.320528
	8	ɧ	0.00513428	-0.343221
	8	i	0.000603623	-0.528801
	8	ɪ	0.0462051	1.33908
	8	iː	0.00944014	-0.166849
	8	ʝ	0.00545946	-0.329902
	8	ʝː	0.000563348	-0.530451
	8	k	0.0282811	0.604895
	8	kː	0.00623285	-0.298223
	8	l	0.0274515	0.570914
	8	ɭ	0.000928977	-0.515474
	8	lː	0.00741197	-0.249925
	8	m	0.0112432	-0.0929949
	8	ɱ	0.00030322	-0.541106
	8	mː	0.00490395	-0.352656
	8	ɱː	8.50642e-06	-0.553178
	8	n	0.0785953	2.66581
	8	ɳ	0.0216339	0.332617
	8	nː	0.00883805	-0.191511
	8	ɳː	0.000113014	-0.548897
	8	ŋ	0.0234541	0.407175
	8	ŋː	0.00358406	-0.40672
	8	o	0.000450901	-0.535057
	8	ɵ	0.00518879	-0.340988
	8	oː	0.00505154	-0.34661
	8	p	0.00986478	-0.149455
	8	pː	0.00206816	-0.468812
	8	r	0.0724057	2.41228
	8	rː	0.00376099	-0.399473
	8	s	0.0986506	3.48729
	8	ʂ	0.0110657	-0.100264
	8	sː	0.00702952	-0.26559
	8	ʂː	0.000495717	-0.533221
	8	t	0.0718017	2.38754
	8	ʈ	0.00226134	-0.4609
	8	tː	0.00546287	-0.329762
	8	ʈː	0.000919489	-0.515863
	8	u	0.000581298	-0.529716
	8	ʉ	0.00279567	-0.439013
	8	ʉ̞	0.000312259	-0.540736
	8	ʊ	0.0127356	-0.0318625
	8	uː	0.00901547	-0.184244
	8	ʉː	0.00335837	-0.415964
	8	v	0.0125157	-0.0408705
	8	vː	7.07384e-05	-0.550629
	8	y	9.83313e-05	-0.549498
	8	ʏ	0.00247311	-0.452225
	8	yː	0.00159907	-0.488027
	8	ø	0.000729338	-0.523652
	8	ø̞	0.00368694	-0.402506
	8	øː	0.00415569	-0.383305
	9	a	0.104998	3.50767
	9	ɑ	0.00129737	-0.484767
	9	ɑː	0.0122501	-0.0630934
	9	a͡u	5.39888e-05	-0.532637
	9	b	0.00724877	-0.255641
	9	bː	0.000403868	-0.519166
	9	ɔ	0.00716162	-0.258996
	9	ɕ	0.00072933	-0.506636
	9	d	0.0349538	0.810989
	9	dː	0.000542649	-0.513823
	9	ɖ	0.00197247	-0.458776
	9	e	0.00212295	-0.452983
	9	e̞	0.11754	3.9905
	9	eː	0.0164029	0.0967865
	9	ɛ	0.000198817	-0.527061
	9	ɛ̝	0.0125802	-0.0503821
	9	ɛː	0.00549866	-0.32302
	9	f	0.00622094	-0.295212
	9	fː	0.00168188	-0.469963
	9	ɡ	0.0191502	0.202558
	9	ɡː	0.00106144	-0.49385
	9	h	0.0058752	-0.308523
	9	ɧ	0.00513397	-0.33706
	9	i	0.000350578	-0.521218
	9	ɪ	0.0401394	1.01063
	9	iː	0.00872484	-0.198813
	9	ʝ	0.00488001	-0.346837
	9	ʝː	0.000385362	-0.519879
	9	k	0.0273265	0.517342
	9	kː	0.00521665	-0.333877
	9	l	0.0230545	0.35287
	9	ɭ	0.000927505	-0.499007
	9	lː	0.0078719	-0.231651
	9	m	0.0112887	-0.100106
	9	ɱ	0.000473274	-0.516494
	9	mː	0.00463809	-0.356151
	9	ɱː	1.41962e-05	-0.534169
	9	n	0.0893399	2.90483
	9	ɳ	0.0270485	0.506637
	9	nː	0.00868016	-0.200533
	9	ɳː	6.18883e-05	-0.532332
	9	ŋ	0.0229497	0.348838
	9	ŋː	0.00281138	-0.426478
	9	o	0.000527187	-0.514419
	9	ɵ	0.00432901	-0.36805
	9	oː	0.00485566	-0.347775
	9	p	0.00839406	-0.211548
	9	pː	0.00203525	-0.456359
	9	r	0.0736093	2.29921
	9	rː	0.00355813	-0.397729
	9	s	0.107074	3.58757
	9	ʂ	0.0121549	-0.0667571
	9	sː	0.00659934	-0.280644
	9	ʂː	0.000417079	-0.518658
	9	t	0.071178	2.2056
	9	ʈ	0.00180083	-0.465384
	9	tː	0.00459313	-0.357882
	9	ʈː	0.00100222	-0.49613
	9	u	0.000411978	-0.518854
	9	ʉ	0.00188738	-0.462052
	9	ʉ̞	0.000144863	-0.529138
	9	ʊ	0.0121721	-0.0660947
	9	uː	0.00833878	-0.213676
	9	ʉː	0.00214835	-0.452005
	9	v	0.0101812	-0.142746
	9	vː	3.71149e-05	-0.533286
	9	y	0.000122996	-0.52998
	9	ʏ	0.00218989	-0.450406
	9	yː	0.00144523	-0.479074
	9	ø	0.00048045	-0.516218
	9	ø̞	0.00309522	-0.415551
	9	øː	0.00395446	-0.38247
	10	a	0.107762	3.50682
	10	ɑ	0.000700405	-0.484595
	10	ɑː	0.0131683	-0.0197729
	10	a͡u	1.35368e-05	-0.510202
	10	a͡uː	1.20327e-05	-0.510258
	10	b	0.00607524	-0.284212
	10	bː	0.000378937	-0.496579
	10	ɔ	0.00730904	-0.238214
	10	ɕ	0.000590965	-0.488675
	10	d	0.0341194	0.76132
	10	dː	0.000446572	-0.494058
	10	ɖ	0.00199996	-0.436145
	10	e	0.00182225	-0.44277
	10	e̞	0.122652	4.06195
	10	eː	0.0159173	0.082717
	10	ɛ	0.000164043	-0.504591
	10	ɛ̝	0.011388	-0.0861454
	10	ɛː	0.0047082	-0.335178
	10	f	0.00607036	-0.284394
	10	fː	0.00144752	-0.456741
	10	ɡ	0.0175609	0.143993
	10	ɡː	0.00104644	-0.471694
	10	h	0.00454195	-0.341376
	10	ɧ	0.00493329	-0.326786
	10	i	0.000444351	-0.494141
	10	ɪ	0.0387529	0.934064
	10	iː	0.00917059	-0.168813
	10	ʝ	0.00423088	-0.352973
	10	ʝː	0.000279345	-0.500292
	10	k	0.0259132	0.45538
	10	kː	0.00551618	-0.305055
	10	l	0.0216392	0.296036
	10	ɭ	0.000505107	-0.491876
	10	lː	0.00745026	-0.232949
	10	m	0.0108106	-0.107669
	10	ɱ	0.000132999	-0.505748
	10	mː	0.00353723	-0.378833
	10	ɱː	1.20327e-05	-0.510258
	10	n	0.0947826	3.02294
	10	ɳ	0.0285295	0.552919
	10	nː	0.00829437	-0.201479
	10	ɳː	6.36344e-05	-0.508334
	10	ŋ	0.0224214	0.3252
	10	ŋː	0.00255699	-0.415378
	10	o	0.000490298	-0.492428
	10	ɵ	0.00405208	-0.359639
	10	oː	0.00445353	-0.344672
	10	p	0.00783695	-0.218533
	10	pː	0.0016268	-0.450057
	10	r	0.0732393	2.21977
	10	rː	0.00313149	-0.39396
	10	s	0.114451	3.75621
	10	ʂ	0.0131599	-0.0200846
	10	sː	0.0066228	-0.263798
	10	ʂː	0.000526979	-0.49106
	10	t	0.0698208	2.09232
	10	ʈ	0.00175568	-0.445252
	10	tː	0.00415754	-0.355707
	10	ʈː	0.00101446	-0.472886
	10	u	0.000414004	-0.495272
	10	ʉ	0.00201564	-0.435561
	10	ʉ̞	0.000163604	-0.504607
	10	ʊ	0.0116882	-0.0749519
	10	uː	0.00760926	-0.227021
	10	ʉː	0.00256441	-0.415102
	10	v	0.00848567	-0.194348
	10	vː	3.18187e-05	-0.509521
	10	y	5.70322e-05	-0.508581
	10	ʏ	0.0018718	-0.440923
	10	yː	0.00151885	-0.454082
	10	ø	0.000678562	-0.485409
	10	ø̞	0.00284688	-0.404571
	10	øː	0.00384311	-0.36743
	11	a	0.109271	3.4331
	11	ɑ	0.000768646	-0.472236
	11	ɑː	0.0121779	-0.0615837
	11	a͡uː	6.01747e-05	-0.497736
	11	b	0.00475901	-0.328611
	11	bː	0.000209192	-0.492373
	11	ɔ	0.00631841	-0.272484
	11	ɕ	0.000686146	-0.475206
	11	d	0.0308806	0.611581
	11	dː	0.00053194	-0.480756
	11	ɖ	0.00154566	-0.44427
	11	e	0.000685186	-0.47524
	11	e̞	0.127652	4.09469
	11	eː	0.0141343	0.00883262
	11	ɛ	0.000174813	-0.49361
	11	ɛ̝	0.0110261	-0.103039
	11	ɛː	0.00386713	-0.360713
	11	f	0.00479722	-0.327236
	11	fː	0.00190823	-0.431219
	11	ɡ	0.0157276	0.0661808
	11	ɡː	0.000934837	-0.466255
	11	h	0.00461596	-0.33376
	11	ɧ	0.00495585	-0.321526
	11	i	0.000301591	-0.489047
	11	ɪ	0.0390736	0.906472
	11	iː	0.00932537	-0.164255
	11	ʝ	0.00434285	-0.34359
	11	ʝː	0.000407816	-0.485224
	11	k	0.0246412	0.387009
	11	kː	0.0047863	-0.327629
	11	l	0.0250077	0.400201
	11	ɭ	0.000376816	-0.48634
	11	lː	0.00811135	-0.207951
	11	m	0.0104515	-0.123722
	11	ɱ	0.000210554	-0.492324
	11	mː	0.00357782	-0.371126
	11	ɱː	1.62842e-05	-0.499316
	11	n	0.100897	3.13169
	11	ɳ	0.030914	0.612785
	11	nː	0.00844253	-0.19603
	11	ɳː	0.000163364	-0.494022
	11	ŋ	0.0239362	0.361632
	11	ŋː	0.00251161	-0.409502
	11	o	0.000329872	-0.488029
	11	ɵ	0.00443265	-0.340358
	11	oː	0.00402511	-0.355027
	11	p	0.00646988	-0.267032
	11	pː	0.00132483	-0.452218
	11	r	0.0687279	1.97382
	11	rː	0.00244607	-0.411861
	11	s	0.117969	3.74616
	11	ʂ	0.0134501	-0.0157942
	11	sː	0.00601791	-0.2833
	11	ʂː	0.000375162	-0.486399
	11	t	0.0730069	2.12783
	11	ʈ	0.00168179	-0.43937
	11	tː	0.00418934	-0.349115
	11	ʈː	0.00131154	-0.452696
	11	u	0.000564034	-0.479601
	11	ʉ	0.00167893	-0.439473
	11	ʉ̞	0.000221797	-0.491919
	11	ʊ	0.00989302	-0.143823
	11	uː	0.00848621	-0.194458
	11	ʉː	0.00211133	-0.423909
	11	v	0.00682859	-0.254121
	11	vː	1.11788e-05	-0.4995
	11	y	6.84534e-05	-0.497438
	11	ʏ	0.00162958	-0.441249
	11	yː	0.000988072	-0.464339
	11	ø	0.000443599	-0.483936
	11	ø̞	0.00276952	-0.400219
	11	øː	0.00336299	-0.378858
	12	a	0.107569	3.24534
	12	ɑ	0.000430698	-0.482017
	12	ɑː	0.0128811	-0.0488661
	12	a͡uː	5.26475e-05	-0.495169
	12	b	0.00355308	-0.373389
	12	bː	0.000594313	-0.476324
	12	ɔ	0.00499579	-0.323197
	12	ɕ	0.000279107	-0.48729
	12	d	0.0332981	0.661442
	12	dː	0.00017845	-0.490792
	12	ɖ	0.00163693	-0.440052
	12	e	0.000623903	-0.475295
	12	e̞	0.135254	4.20849
	12	eː	0.0152337	0.0329815
	12	ɛ	0.000117757	-0.492904
	12	ɛ̝	0.00969174	-0.159824
	12	ɛː	0.00307917	-0.389876
	12	f	0.00394266	-0.359835
	12	fː	0.00199278	-0.427672
	12	ɡ	0.0145966	0.0108172
	12	ɡː	0.00081745	-0.468561
	12	h	0.00378216	-0.365419
	12	ɧ	0.00558634	-0.302652
	12	i	0.000142085	-0.492057
	12	ɪ	0.0418053	0.957407
	12	iː	0.00935709	-0.171467
	12	ʝ	0.00419443	-0.351076
	12	ʝː	0.000215494	-0.489504
	12	k	0.0224449	0.283859
	12	kː	0.00478269	-0.330611
	12	l	0.0224761	0.284946
	12	ɭ	0.000422579	-0.482299
	12	lː	0.00813086	-0.214127
	12	m	0.0105821	-0.128848
	12	ɱ	0.000106775	-0.493286
	12	mː	0.00336822	-0.37982
	12	n	0.108416	3.27481
	12	ɳ	0.0319271	0.613745
	12	nː	0.00772974	-0.228082
	12	ɳː	9.98972e-05	-0.493525
	12	ŋ	0.0269278	0.43982
	12	ŋː	0.00182943	-0.433355
	12	o	0.00024467	-0.488488
	12	ɵ	0.0030889	-0.389538
	12	oː	0.00457654	-0.337782
	12	p	0.00614374	-0.28326
	12	pː	0.0016981	-0.437924
	12	r	0.0649903	1.76401
	12	rː	0.00246232	-0.411336
	12	s	0.117665	3.59656
	12	ʂ	0.01501	0.0251976
	12	sː	0.00469411	-0.333692
	12	ʂː	0.000393657	-0.483305
	12	t	0.0711095	1.9769
	12	ʈ	0.00103922	-0.460846
	12	tː	0.00499542	-0.32321
	12	ʈː	0.000937304	-0.464392
	12	u	0.000249618	-0.488316
	12	ʉ	0.00182275	-0.433587
	12	ʉ̞	0.000100063	-0.493519
	12	ʊ	0.00949862	-0.166543
	12	uː	0.00728484	-0.243561
	12	ʉː	0.00256269	-0.407844
	12	v	0.00656455	-0.26862
	12	y	9.73973e-05	-0.493612
	12	ʏ	0.00151827	-0.44418
	12	yː	0.000964688	-0.463439
	12	ø	0.000241544	-0.488597
	12	ø̞	0.00186559	-0.432097
	12	øː	0.0030336	-0.391461
	13	a	0.103646	3.01361
	13	ɑ	0.000522906	-0.464142
	13	ɑː	0.0114064	-0.0971046
	13	a͡u	6.34788e-05	-0.479636
	13	b	0.00240259	-0.400751
	13	bː	9.59327e-05	-0.478542
	13	ɔ	0.00410996	-0.343171
	13	ɕ	0.000229812	-0.474027
	13	d	0.030898	0.56024
	13	dː	0.000308729	-0.471365
	13	ɖ	0.00139375	-0.434773
	13	e	0.000421251	-0.46757
	13	e̞	0.140341	4.25112
	13	eː	0.0126128	-0.0564188
	13	ɛ	0.000145359	-0.476875
	13	ɛ̝	0.0093301	-0.167125
	13	ɛː	0.00314724	-0.375638
	13	f	0.00343599	-0.3659
	13	fː	0.00210631	-0.410743
	13	ɡ	0.0138817	-0.0136235
	13	ɡː	0.000914386	-0.45094
	13	h	0.00448608	-0.330487
	13	ɧ	0.00575474	-0.287702
	13	i	0.000203337	-0.474919
	13	ɪ	0.0398331	0.861569
	13	iː	0.00917469	-0.172366
	13	ʝ	0.00320094	-0.373827
	13	ʝː	7.39681e-05	-0.479282
	13	k	0.0210332	0.227556
	13	kː	0.00394353	-0.348784
	13	l	0.0210043	0.226582
	13	ɭ	0.000467863	-0.465999
	13	lː	0.00566559	-0.290708
	13	m	0.0109211	-0.113469
	13	ɱ	7.93485e-06	-0.481509
	13	mː	0.00359024	-0.360698
	13	n	0.113344	3.34068
	13	ɳ	0.0367962	0.759153
	13	nː	0.00756805	-0.226549
	13	ɳː	0.000160449	-0.476366
	13	ŋ	0.0315548	0.58239
	13	ŋː	0.00187027	-0.418703
	13	o	0.000208246	-0.474754
	13	ɵ	0.00257181	-0.395044
	13	oː	0.00338314	-0.367683
	13	p	0.00455585	-0.328134
	13	pː	0.0010756	-0.445503
	13	r	0.0684378	1.82625
	13	rː	0.00106542	-0.445846
	13	s	0.124326	3.71103
	13	ʂ	0.0155651	0.0431456
	13	sː	0.00425662	-0.338225
	13	ʂː	0.00023887	-0.473721
	13	t	0.0712172	1.91998
	13	ʈ	0.000927024	-0.450514
	13	tː	0.0046223	-0.325893
	13	ʈː	0.000877391	-0.452187
	13	u	0.000333547	-0.470528
	13	ʉ	0.00100093	-0.448021
	13	ʉ̞	7.08625e-05	-0.479387
	13	ʊ	0.00977117	-0.15225
	13	uː	0.00906827	-0.175955
	13	ʉː	0.00213584	-0.409747
	13	v	0.00512632	-0.308895
	13	y	1.19023e-05	-0.481376
	13	ʏ	0.000844063	-0.453311
	13	yː	0.000776739	-0.455582
	13	ø	0.000219588	-0.474371
	13	ø̞	0.00156642	-0.42895
	13	øː	0.00367899	-0.357705
	14	a	0.109954	2.98454
	14	ɑ	0.000411317	-0.472545
	14	ɑː	0.0101177	-0.166219
	14	b	0.00220586	-0.415911
	14	bː	0.000134174	-0.481292
	14	ɔ	0.00375128	-0.367139
	14	ɕ	0.000129248	-0.481447
	14	d	0.0283555	0.40935
	14	dː	0.000197235	-0.479302
	14	ɖ	0.00164539	-0.433599
	14	e	9.03716e-05	-0.482674
	14	e̞	0.144543	4.07613
	14	eː	0.0118957	-0.110106
	14	ɛ̝	0.00886335	-0.205806
	14	ɛː	0.00188257	-0.426114
	14	f	0.0017742	-0.429534
	14	fː	0.00201766	-0.42185
	14	ɡ	0.0136471	-0.0548346
	14	ɡː	0.000750215	-0.46185
	14	h	0.00401938	-0.358678
	14	ɧ	0.00499403	-0.327919
	14	i	4.57365e-05	-0.484083
	14	ɪ	0.0438308	0.89774
	14	iː	0.00882089	-0.207146
	14	ʝ	0.00261912	-0.402869
	14	ʝː	0.000239725	-0.477961
	14	k	0.0194831	0.129344
	14	kː	0.00313304	-0.38665
	14	l	0.0166568	0.040148
	14	ɭ	0.000354514	-0.474338
	14	lː	0.00499293	-0.327953
	14	m	0.00894799	-0.203135
	14	mː	0.00362519	-0.371118
	14	n	0.122437	3.37848
	14	ɳ	0.0398259	0.771349
	14	nː	0.00793676	-0.235048
	14	ŋ	0.0326207	0.543957
	14	ŋː	0.00165217	-0.433385
	14	o	0.00037289	-0.473758
	14	ɵ	0.00204583	-0.420962
	14	oː	0.00396246	-0.360474
	14	p	0.00488897	-0.331234
	14	pː	0.000543845	-0.468363
	14	r	0.0654543	1.58016
	14	rː	0.00156245	-0.436216
	14	s	0.127505	3.53845
	14	ʂ	0.0172212	0.0579605
	14	sː	0.00378578	-0.36605
	14	ʂː	0.000352095	-0.474414
	14	t	0.0684233	1.67386
	14	ʈ	0.000373175	-0.473749
	14	tː	0.00283925	-0.395922
	14	ʈː	0.000564235	-0.467719
	14	u	0.000132034	-0.481359
	14	ʉ	0.001068	-0.451821
	14	ʉ̞	0.000318324	-0.47548
	14	ʊ	0.0075389	-0.247604
	14	uː	0.00951815	-0.185141
	14	ʉː	0.00228656	-0.413364
	14	v	0.00525802	-0.319587
	14	ʏ	0.000868535	-0.458116
	14	yː	0.00113731	-0.449634
	14	ø	0.000204114	-0.479085
	14	ø̞	0.000906035	-0.456932
	14	øː	0.0022673	-0.413972
	15	a	0.11278	3.00432
	15	ɑ	0.000314471	-0.464863
	15	ɑː	0.00984639	-0.170836
	15	a͡u	6.79e-05	-0.472469
	15	b	0.0012859	-0.434898
	15	ɔ	0.00347236	-0.367453
	15	ɕ	0.000284414	-0.465791
	15	d	0.0233149	0.244621
	15	dː	4.74023e-05	-0.473102
	15	ɖ	0.000950216	-0.445253
	15	e	0.00015035	-0.469926
	15	e̞	0.144642	3.98715
	15	eː	0.0115766	-0.117464
	15	ɛ̝	0.00621393	-0.282885
	15	ɛː	0.00155744	-0.426522
	15	f	0.0016721	-0.422985
	15	fː	0.00181698	-0.418516
	15	ɡ	0.0142382	-0.0353629
	15	ɡː	0.000731188	-0.452009
	15	h	0.00468849	-0.32994
	15	ɧ	0.00649611	-0.274181
	15	i	0.000207202	-0.468172
	15	ɪ	0.0441447	0.887153
	15	iː	0.00806648	-0.22574
	15	ʝ	0.00209575	-0.409917
	15	k	0.0165464	0.035838
	15	kː	0.00256848	-0.395335
	15	l	0.0156848	0.00926114
	15	ɭ	0.000245999	-0.466976
	15	lː	0.00547246	-0.305757
	15	m	0.00864058	-0.208031
	15	mː	0.00205393	-0.411207
	15	n	0.123533	3.33603
	15	ɳ	0.0434444	0.86555
	15	nː	0.00685868	-0.262997
	15	ɳː	0.000130026	-0.470553
	15	ŋ	0.0390444	0.729826
	15	ŋː	0.00151784	-0.427743
	15	o	0.00016975	-0.469328
	15	ɵ	0.00203498	-0.411791
	15	oː	0.0028677	-0.386105
	15	p	0.00369785	-0.360498
	15	pː	0.00103767	-0.442555
	15	r	0.0621029	1.4411
	15	rː	0.00100192	-0.443658
	15	s	0.134061	3.66078
	15	ʂ	0.0189276	0.109291
	15	sː	0.00512416	-0.316501
	15	ʂː	7.28648e-05	-0.472316
	15	t	0.0719208	1.74395
	15	ʈ	0.000130045	-0.470552
	15	tː	0.0032515	-0.374266
	15	ʈː	0.000860066	-0.448034
	15	u	1.6975e-05	-0.47404
	15	ʉ	0.000854355	-0.44821
	15	ʉ̞	4.24375e-05	-0.473255
	15	ʊ	0.00648323	-0.274578
	15	uː	0.00921375	-0.19035
	15	ʉː	0.00221138	-0.40635
	15	v	0.00357564	-0.364267
	15	ʏ	0.00044526	-0.460829
	15	yː	0.000983874	-0.444215
	15	ø	0.000132277	-0.470483
	15	ø̞	0.000270617	-0.466216
	15	øː	0.00210616	-0.409596
	16	a	0.125433	3.08207
	16	ɑ	0.00011183	-0.478355
	16	ɑː	0.00701388	-0.282265
	16	b	0.00181358	-0.430008
	16	ɔ	0.0020712	-0.422688
	16	d	0.0223181	0.152534
	16	dː	0.000173918	-0.476591
	16	ɖ	0.000492666	-0.467535
	16	e	0.000190187	-0.476129
	16	e̞	0.148732	3.744
	16	eː	0.0098849	-0.200698
	16	ɛ̝	0.00548069	-0.325824
	16	ɛː	0.00141677	-0.441281
	16	f	0.000994251	-0.453285
	16	fː	0.00107376	-0.451026
	16	ɡ	0.0125378	-0.125327
	16	ɡː	0.000815698	-0.458358
	16	h	0.0054992	-0.325298
	16	ɧ	0.00588262	-0.314405
	16	ɪ	0.0328708	0.45234
	16	iː	0.00776773	-0.260848
	16	ʝ	0.00238144	-0.413875
	16	k	0.0158111	-0.032333
	16	kː	0.00264727	-0.406322
	16	l	0.0149662	-0.056337
	16	lː	0.00298902	-0.396613
	16	m	0.0073479	-0.272775
	16	ɱ	0.000165695	-0.476825
	16	mː	0.00293971	-0.398014
	16	n	0.124693	3.06105
	16	ɳ	0.0453598	0.807158
	16	nː	0.0068924	-0.285716
	16	ɳː	0.000120602	-0.478106
	16	ŋ	0.0455012	0.811174
	16	ŋː	0.00153473	-0.43793
	16	o	0.000162818	-0.476906
	16	ɵ	0.000906977	-0.455765
	16	oː	0.00243462	-0.412364
	16	p	0.00361607	-0.378798
	16	pː	0.000333203	-0.472066
	16	r	0.060011	1.2234
	16	rː	0.000376217	-0.470844
	16	s	0.144482	3.62325
	16	ʂ	0.0192594	0.065635
	16	sː	0.00346226	-0.383168
	16	t	0.0692045	1.48459
	16	ʈ	0.00028342	-0.47348
	16	tː	0.00224987	-0.417613
	16	ʈː	0.000222135	-0.475221
	16	ʉ	0.000207993	-0.475623
	16	ʊ	0.00652999	-0.296012
	16	uː	0.0105721	-0.181176
	16	ʉː	0.00120276	-0.447361
	16	v	0.0042036	-0.362106
	16	ʏ	0.000297562	-0.473078
	16	yː	0.00041159	-0.469839
	16	ø	7.76248e-05	-0.479327
	16	ø̞	0.000736258	-0.460615
	16	øː	0.00283164	-0.401084
	17	a	0.131236	2.86614
	17	ɑ	0.000102589	-0.489479
	17	ɑː	0.00571953	-0.345744
	17	b	0.00103285	-0.465674
	17	ɔ	0.000926317	-0.4684
	17	d	0.0190512	-0.00459541
	17	ɖ	0.000164142	-0.487904
	17	e	0.000278732	-0.484971
	17	e̞	0.14969	3.33837
	17	eː	0.0141117	-0.130993
	17	ɛ̝	0.00391738	-0.391861
	17	ɛː	0.00172483	-0.447966
	17	f	0.000671222	-0.474928
	17	fː	0.00136879	-0.457077
	17	ɡ	0.00891236	-0.264042
	17	h	0.00457171	-0.375117
	17	ɧ	0.00630026	-0.330884
	17	ɪ	0.0320709	0.32857
	17	iː	0.00958653	-0.24679
	17	ʝ	0.00136357	-0.457211
	17	k	0.0115855	-0.195637
	17	kː	0.00207752	-0.438941
	17	l	0.00869074	-0.269713
	17	lː	0.0021576	-0.436892
	17	m	0.00534936	-0.355217
	17	mː	0.00142368	-0.455673
	17	n	0.139047	3.06602
	17	ɳ	0.0526261	0.854567
	17	nː	0.00815026	-0.283544
	17	ŋ	0.0367131	0.447362
	17	ŋː	0.000278809	-0.484969
	17	ɵ	0.00113782	-0.462988
	17	oː	0.00286734	-0.41873
	17	p	0.00272705	-0.42232
	17	pː	0.000164142	-0.487904
	17	r	0.0620423	1.09552
	17	rː	0.000298784	-0.484458
	17	s	0.157288	3.53281
	17	ʂ	0.0231573	0.100479
	17	sː	0.00121989	-0.460888
	17	t	0.0639126	1.14338
	17	tː	0.00335022	-0.406374
	17	ʈː	0.000393323	-0.482039
	17	ʉ	0.000613821	-0.476397
	17	ʊ	0.00471846	-0.371361
	17	uː	0.00970573	-0.24374
	17	ʉː	0.00209647	-0.438456
	17	v	0.00173009	-0.447832
	17	yː	0.000367408	-0.482702
	17	ø	0.000172191	-0.487698
	17	ø̞	0.000128193	-0.488823
	17	øː	0.00100885	-0.466288
	18	a	0.138006	2.80446
	18	ɑː	0.00216425	-0.446834
	18	b	0.00128069	-0.467982
	18	ɔ	0.00149438	-0.462867
	18	d	0.0170143	-0.0914058
	18	ɖ	0.000703433	-0.481798
	18	e̞	0.138433	2.81469
	18	eː	0.0114129	-0.225473
	18	ɛ̝	0.00210245	-0.448314
	18	ɛː	0.000545687	-0.485574
	18	f	0.00128142	-0.467964
	18	fː	0.000778074	-0.480012
	18	ɡ	0.00910261	-0.280769
	18	h	0.0038849	-0.405652
	18	ɧ	0.00699869	-0.331125
	18	ɪ	0.0235345	0.06465
	18	iː	0.00480913	-0.383531
	18	ʝ	0.000605538	-0.484141
	18	k	0.0105624	-0.245828
	18	kː	0.00248141	-0.439243
	18	l	0.007176	-0.326881
	18	lː	0.00156524	-0.461171
	18	m	0.00429479	-0.395841
	18	mː	0.00289096	-0.429441
	18	n	0.143838	2.94406
	18	ɳ	0.0571126	0.868325
	18	nː	0.00647888	-0.343566
	18	ŋ	0.0369246	0.385136
	18	ŋː	0.000565638	-0.485096
	18	ɵ	0.000956797	-0.475734
	18	oː	0.00188043	-0.453627
	18	p	0.00292185	-0.428702
	18	r	0.0618183	0.980953
	18	rː	0.000272844	-0.492104
	18	s	0.172725	3.63544
	18	ʂ	0.0252961	0.106813
	18	sː	0.00215493	-0.447057
	18	t	0.0724124	1.23452
	18	ʈ	0.00102403	-0.474125
	18	tː	0.000647229	-0.483143
	18	ʈː	0.000422645	-0.488519
	18	ʊ	0.00374178	-0.409077
	18	uː	0.0108475	-0.239005
	18	ʉː	0.0017843	-0.455928
	18	v	0.00234766	-0.442444
	18	yː	6.82109e-05	-0.497002
	18	ø̞	0.000122267	-0.495708
	18	øː	0.000513096	-0.486354
	19	a	0.149232	2.65419
	19	ɑː	0.00389075	-0.435828
	19	ɔ	0.0010301	-0.496646
	19	d	0.00976206	-0.311001
	19	ɖ	0.000482352	-0.508292
	19	e̞	0.14866	2.64203
	19	eː	0.00866673	-0.334289
	19	ɛ̝	0.00277992	-0.459445
	19	f	0.0020832	-0.474257
	19	fː	0.00062235	-0.505315
	19	ɡ	0.00576238	-0.396036
	19	h	0.00314553	-0.451672
	19	ɧ	0.00715596	-0.366408
	19	ɪ	0.0208073	-0.0761759
	19	iː	0.00574359	-0.396436
	19	ʝ	0.00234071	-0.468782
	19	k	0.0116423	-0.271027
	19	kː	0.00151553	-0.486326
	19	l	0.00767541	-0.355364
	19	lː	0.001025	-0.496755
	19	m	0.00372166	-0.439423
	19	mː	0.00200174	-0.475989
	19	n	0.132899	2.30695
	19	ɳ	0.0580618	0.715872
	19	nː	0.00290654	-0.456753
	19	ŋ	0.0352313	0.230486
	19	ŋː	0.000517621	-0.507542
	19	ɵ	0.00239492	-0.46763
	19	oː	0.00120588	-0.492909
	19	r	0.056499	0.682645
	19	rː	0.000588161	-0.506042
	19	s	0.198675	3.70537
	19	ʂ	0.0247308	0.00723959
	19	sː	0.00143691	-0.487998
	19	t	0.0631547	0.824149
	19	tː	0.0015019	-0.486616
	19	ʊ	0.00237195	-0.468118
	19	uː	0.0131566	-0.238832
	19	ʉː	0.00122392	-0.492526
	19	v	0.00156203	-0.485337
	19	øː	0.00213521	-0.473151
	20	a	0.147491	2.27484
	20	ɑː	0.00442375	-0.461927
	20	b	0.00040121	-0.538875
	20	d	0.0148837	-0.261837
	20	e̞	0.136214	2.05913
	20	eː	0.00684582	-0.415595
	20	ɛ̝	0.000895318	-0.529423
	20	ɡ	0.00308854	-0.487468
	20	ɡː	0.000895318	-0.529423
	20	h	0.00393603	-0.471257
	20	ɧ	0.00269343	-0.495027
	20	ɪ	0.0125108	-0.307229
	20	iː	0.00344443	-0.480661
	20	ʝ	0.00147391	-0.518355
	20	k	0.00337844	-0.481923
	20	kː	0.00143333	-0.519131
	20	l	0.00671106	-0.418172
	20	m	0.00572105	-0.437111
	20	mː	0.00265894	-0.495686
	20	n	0.159621	2.50688
	20	ɳ	0.0622439	0.644129
	20	nː	0.00704245	-0.411833
	20	ŋ	0.0308345	0.0432913
	20	ɵ	0.00148264	-0.518188
	20	p	0.00172263	-0.513597
	20	r	0.0596734	0.594958
	20	s	0.212821	3.52455
	20	ʂ	0.0268681	-0.0325826
	20	sː	0.00248442	-0.499025
	20	t	0.0563376	0.531145
	20	tː	0.00191203	-0.509974
	20	ʈː	0.000895318	-0.529423
	20	ʊ	0.00134298	-0.52086
	20	uː	0.0140324	-0.27812
	20	v	0.00158582	-0.516214
	21	a	0.165793	1.98944
	21	ɑː	0.00184036	-0.603503
	21	bː	0.00175433	-0.604864
	21	d	0.0110951	-0.457138
	21	e̞	0.143578	1.63811
	21	eː	0.00771245	-0.510635
	21	ɛ̝	0.00435331	-0.56376
	21	ɡ	0.00166659	-0.606252
	21	ɪ	0.0183322	-0.342681
	21	iː	0.00288805	-0.586934
	21	k	0.00574374	-0.541771
	21	l	0.00226351	-0.596811
	21	n	0.155431	1.82557
	21	ɳ	0.0668685	0.424931
	21	nː	0.00303343	-0.584635
	21	ŋ	0.0210055	-0.300402
	21	ɵ	0.000786151	-0.620176
	21	r	0.0613074	0.336981
	21	s	0.234598	3.0776
	21	ʂ	0.028649	-0.179518
	21	t	0.0501886	0.161135
	21	tː	0.00175433	-0.604864
	21	ʊ	0.00188261	-0.602835
	21	uː	0.00549692	-0.545674
	21	v	0.00197853	-0.601318
	22	a	0.149879	1.39243
	22	ɑː	0.00359986	-0.766984
	22	d	0.00641132	-0.72548
	22	e̞	0.126767	1.05125
	22	fː	0.00359986	-0.766984
	22	ɡ	0.00763949	-0.70735
	22	ɧ	0.00359986	-0.766984
	22	ɪ	0.0217603	-0.498894
	22	k	0.00899966	-0.687271
	22	n	0.159482	1.53418
	22	ɳ	0.0703327	0.218144
	22	nː	0.0137401	-0.617291
	22	ŋ	0.0295178	-0.384376
	22	r	0.0644735	0.131649
	22	s	0.243904	2.78045
	22	ʂ	0.0328881	-0.334623
	22	t	0.0525054	-0.0450273
	22	uː	0.000899966	-0.80684
	23	a	0.192565	1.62585
	23	d	0.00351669	-0.815513
	23	e̞	0.120121	0.690306
	23	ɪ	0.0178459	-0.630467
	23	iː	0.0162691	-0.650829
	23	l	0.00784766	-0.759583
	23	n	0.128445	0.797801
	23	ɳ	0.0540368	-0.163101
	23	ŋ	0.0395896	-0.349671
	23	ɵ	0.00196191	-0.835591
	23	r	0.0414584	-0.325537
	23	s	0.276145	2.70518
	23	ʂ	0.0221549	-0.574821
	23	t	0.0701948	0.045562
	23	uː	0.00784766	-0.759583
	24	a	0.17011	0.854075
	24	d	0.00774178	-0.896846
	24	e̞	0.108739	0.192276
	24	m	0.00466102	-0.930068
	24	n	0.162095	0.76764
	24	ɳ	0.0536017	-0.40231
	24	ŋ	0.0423973	-0.523134
	24	r	0.0724079	-0.19951
	24	s	0.327364	2.54985
	24	ʂ	0.0233051	-0.729017
	24	t	0.0275766	-0.682954
	25	a	0.204848	0.951182
	25	e̞	0.102525	-0.267733
	25	n	0.117816	-0.0855741
	25	ɳ	0.0877013	-0.444318
	25	r	0.0583961	-0.793413
	25	s	0.310619	2.21117
	25	ʂ	0.0438506	-0.966685
	25	t	0.0742438	-0.604628
	26	a	0.237795	0.847273
	26	n	0.136637	-0.0555097
	26	ɳ	0.0679416	-0.668581
	26	r	0.0968242	-0.410819
	26	s	0.370406	2.03075
	26	ʂ	0.0339708	-0.971752
	26	t	0.0564243	-0.771367
	27	a	0.307692	-1
	27	s	0.692308	1
	28	s	1	0
